# Supplementary material for: The effect of using games in teaching conservation
Source: PeerJ journal article supplement (doi:10.7717/peerj.4509), 2018-04-30
Supplement: Supplementary_Figure_S1_updated.pdf [file Supplementary_Figure_S1_updated.pdf]

Supplementary Figure S1

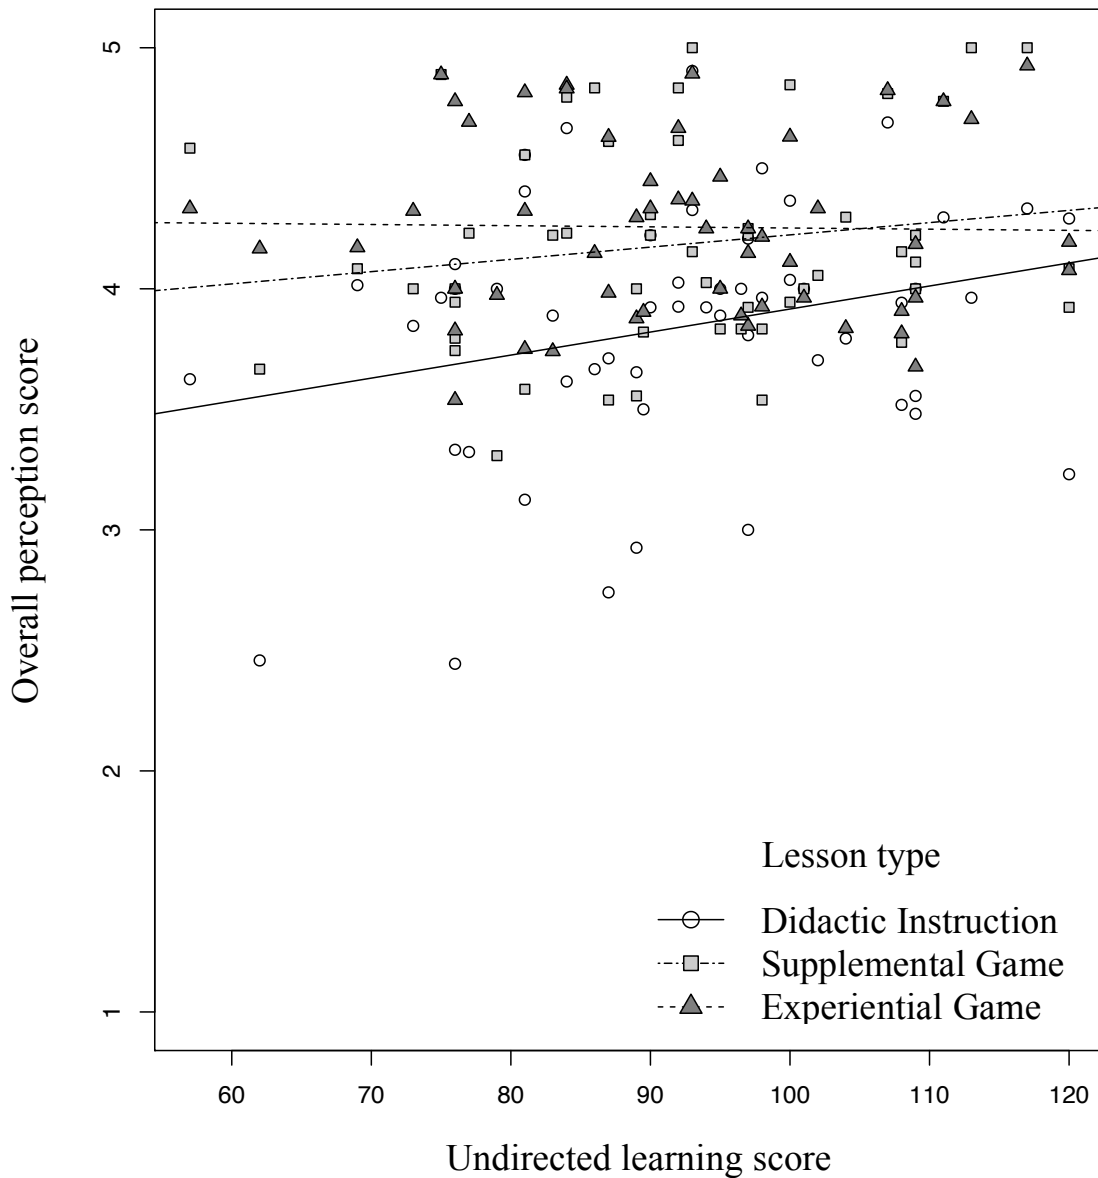

Figure S1. Figure showing relationship between overall perception score and undirected learning score. There was a significant interaction between lesson type and undirected learning score (General Linear Mixed Model models:  $\chi^2 = 7.29$ ,  $df = 2$ ,  $p = 0.026$ ). The correlation coefficient for Didactic Instruction is 0.009, that for Supplemental Game is 0.005 and that for Experiential Game is 0.
